# Supplementary material for: Hydrogen gas-assisted synthesis of worm-like PtMo wavy nanowires as efficient catalysts for the methanol oxidation reaction
Source: Royal Society of Chemistry journal article supplement (doi:10.1039/c6ta02053d), 2016-01-01
Supplement: c6ta02053d1.pdf [file c6ta02053d1.pdf]

## Supporting information

### Hydrogen Gas-Assisted Synthesis of Wormlike PtMo Wavy Nanowires as Efficient Catalyst for Methanol Oxidation Reaction

Shuanglong Lu,<sup>a</sup> Kamel Eid,<sup>b,c,d</sup> Ming Lin,<sup>e</sup> Liang Wang,<sup>b</sup> Hongjing Wang,<sup>\*b</sup> Hongwei Gu<sup>\*a</sup>

<sup>a</sup> Key Laboratory of Organic Synthesis of Jiangsu Province, College of Chemistry, Chemical Engineering and Materials Science & Collaborative Innovation Center of Suzhou Nano Science and Technology, Soochow University, Suzhou 215123, China.

<sup>b</sup> College of Chemical Engineering, Zhejiang University of Technology, Hangzhou, Zhejiang 310014, P.R. China.

<sup>c</sup> State Key Laboratory of Electroanalytical Chemistry, Changchun Institute of Applied Chemistry, Chinese Academy of Sciences, Changchun, Jilin 130022, P.R. China.

<sup>d</sup> University of Chinese Academy of Sciences, Beijing 100039, P.R. China.

<sup>e</sup> Institute of Materials Research and Engineering, A\*star (Agency for Science, Technology and Research), 3 Research Link, S117602, Singapore.

\*E-mail: [hongwei@suda.edu.cn](mailto:hongwei@suda.edu.cn);

[hjw@zjut.edu.cn](mailto:hjw@zjut.edu.cn)

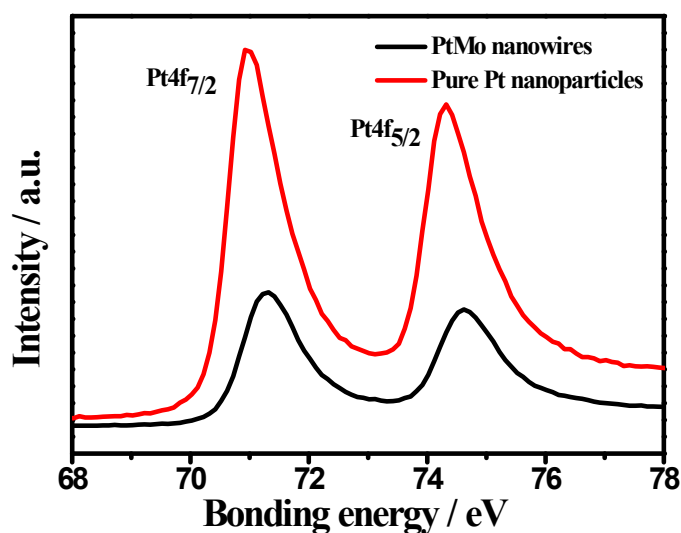

Figure S1. XPS spectra of the PtMo nanowires and Pt nanoparticles.

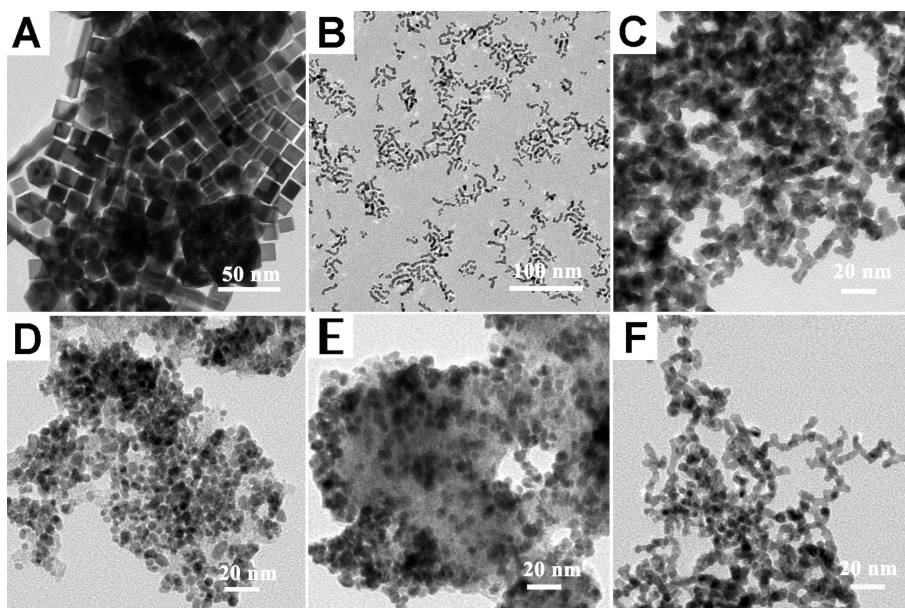

**Figure S2.** Typical TEM images of nanostructures prepared using the standard procedure with varying amounts of Mo precursors: 0 mmol (**A**); 0.0625 mmol (**B**); 0.25 mmol (**C**); 4-tert-butyltoluene (**D**); 1-octadecene (**E**) and at 180°C (**F**).

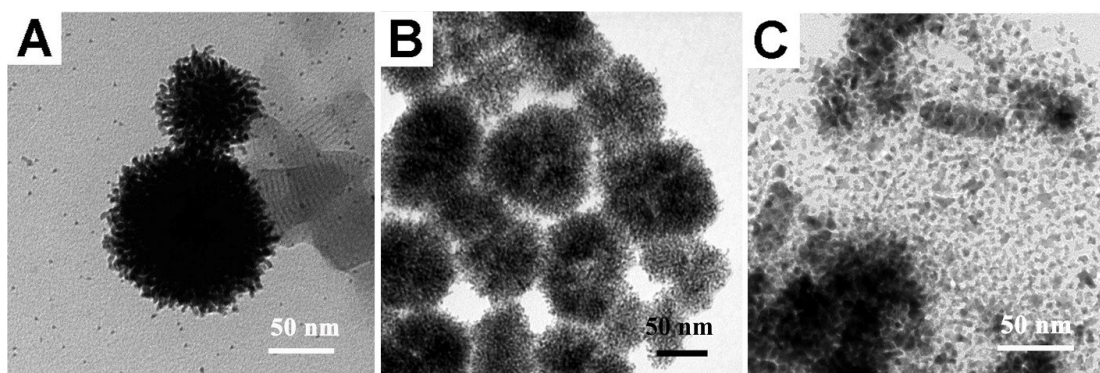

**Figure S3.** PtMo nanoparticles prepared by via normal atmosphere H<sub>2</sub> gas (**A**); by using N<sub>2</sub> instead of H<sub>2</sub> (**B**), and by normal atmosphere N<sub>2</sub> gas (**C**).

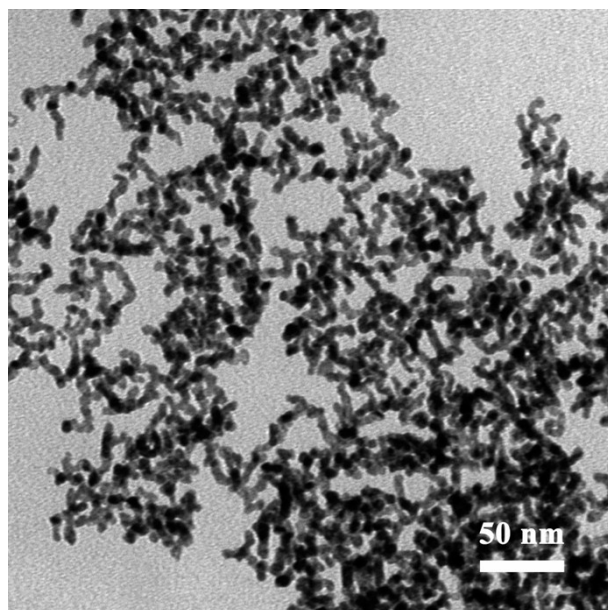

**Figure S4.** TEM images of the Mo-doped Pt nanowire networks when the reaction time was 3 h.

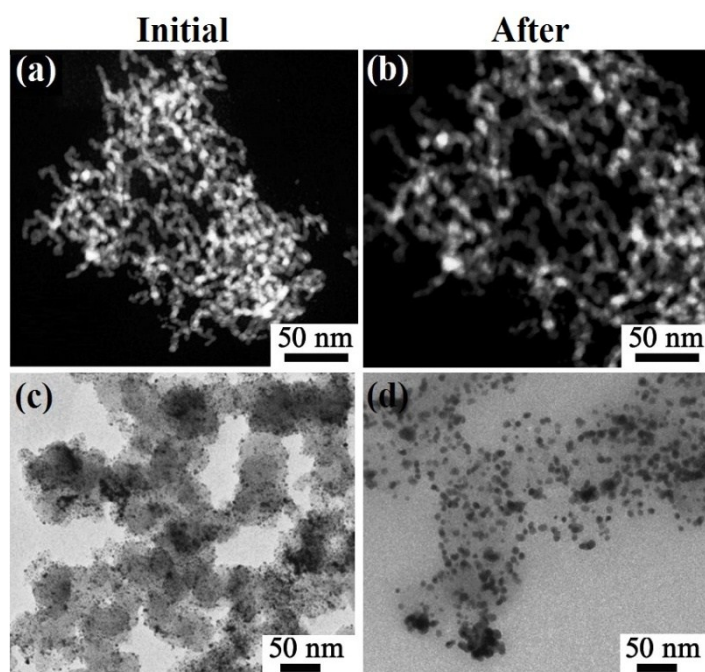

**Figure S5.** TEM images of (a, b) PtMo nanowires and (c, d) commercial Pt/C catalyst before and after 2,000 potential durability cycles, respectively.
